# Supplementary material for: Tunability of Hybrid Silica Xerogels: Surface Chemistry and Porous Texture Based on the Aromatic Precursor
Source: MDPI journal article supplement (doi:10.3390/gels9050382), 2023-05-05
Supplement: s1 [file s1]

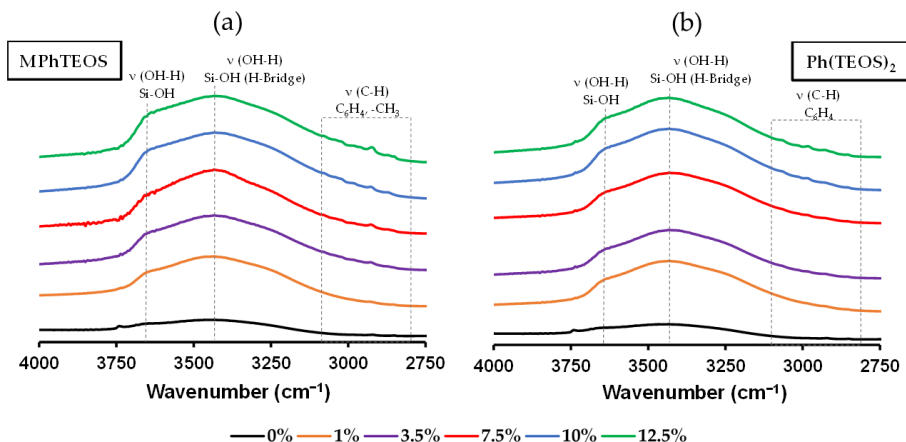

**Figure S1.** FT-IR spectra (range 4000–2750 cm<sup>-1</sup>) of the reference material and the hybrid xerogels of: (a) MPhTEOS series and (b) Ph(TEOS)<sub>2</sub> series.

**Table S1.** Chemical shifts and integral areas of the Q signals in the <sup>29</sup>Si NMR spectra of both series of hybrid xerogels.

| Precursor             | Molar Percentage (%) | <sup>29</sup> Si NMR (ppm) |                |                |       | Band Area      |                |                |
|-----------------------|----------------------|----------------------------|----------------|----------------|-------|----------------|----------------|----------------|
|                       |                      | Q <sup>2</sup>             | Q <sup>3</sup> | Q <sup>4</sup> | Q     | Q <sup>2</sup> | Q <sup>3</sup> | Q <sup>4</sup> |
| TEOS                  | 0                    | -91.8                      | -100.8         | -110.0         | 100.0 | 18.2           | 66.4           | 15.4           |
|                       | 1                    | -91.7                      | -100.8         | -110.0         | 100.0 | 17.2           | 67.3           | 15.5           |
|                       | 3.5                  | -91.7                      | -100.7         | -110.0         | 95.6  | 14.6           | 64.0           | 17.0           |
|                       | 7.5                  | -91.8                      | -100.8         | -110.0         | 93.0  | 12.4           | 61.9           | 18.7           |
|                       | 10                   | -91.6                      | -100.5         | -109.6         | 88.7  | 12.9           | 58.5           | 17.3           |
|                       | 12.5                 | -91.8                      | -100.7         | -109.7         | 89.8  | 11.7           | 61.5           | 16.6           |
| Ph(TEOS) <sub>2</sub> | 1                    | -89.8                      | -98.7          | -108.0         | 100.0 | 11.1           | 72.0           | 16.9           |
|                       | 3.5                  | -91.6                      | -101.1         | -110.5         | 85.5  | 10.4           | 57.4           | 17.7           |
|                       | 7.5                  | -91.5                      | -101.1         | -110.8         | 83.7  | 10.5           | 54.1           | 19.2           |
|                       | 10                   | -91.7                      | -100.8         | -110.0         | 78.9  | 12.1           | 50.2           | 16.5           |
|                       | 12.5                 | -91.5                      | -100.6         | -109.8         | 70.8  | 12.6           | 45.0           | 13.2           |

**Table S2.** Bragg angles (2θ) and bond distances (d<sub>1</sub> and d<sub>2</sub> (nm)) calculated from XRD maxima of both series of hybrid xerogels.

| Precursor | Molar Percentage (%) | Peak 2 θ < 10°      |                     | Peak 10° > 2 θ < 30° |                     |
|-----------|----------------------|---------------------|---------------------|----------------------|---------------------|
|           |                      | 2θ <sub>1</sub> (°) | d <sub>1</sub> (nm) | 2θ <sub>2</sub> (°)  | d <sub>2</sub> (nm) |
| TEOS      | 0                    | a                   | a                   | 23.48                | 0.38                |
|           | 1                    | a                   | a                   | 23.35                | 0.38                |
|           | 3.5                  | a                   | a                   | 23.82                | 0.37                |
|           | 7.5                  | 4.30                | 2.06                | 24.61                | 0.36                |
|           | 10                   | 4.43                | 1.99                | 23.78                | 0.37                |
|           | 12.5                 | 3.75                | 2.35                | 23.13                | 0.38                |
| MPhTEOS   | 1                    | a                   | a                   | 24.16                | 0.37                |
|           | 3.5                  | a                   | a                   | 23.23                | 0.38                |
|           | 7.5                  | a                   | a                   | 23.28                | 0.38                |
|           | 10                   | a                   | a                   | 24.14                | 0.37                |
|           | 12.5                 | a                   | a                   | 23.80                | 0.37                |

a, Non-detected.
